# Supplementary material for: Antiproliferative activity of novel isatinyl/indanyl nitrones (INs) as potential spin trapping agents of free radical intermediates
Source: Royal Society of Chemistry journal article supplement (doi:10.1039/c7md00537g), 2017-12-20

## Supporting Information

### Antiproliferative Activity of Novel Isatinyl/Indanyl Nitrones (INs) as Potential *Spin Trapping* of Free Radical Intermediates.

Loredana Maiuolo,\*<sup>a</sup> Giordana Feriotto,<sup>b</sup> Vincenzo Algieri,<sup>a</sup> Monica Nardi,<sup>a,c</sup> Beatrice Russo,<sup>a</sup> Maria Luisa Di Gioia<sup>d</sup>, Emilia, Furia,<sup>a</sup> Matteo Antonio Tallarida,<sup>a</sup> Carlo Mischiati,<sup>e</sup> Antonio De Nino\*<sup>a</sup>

<sup>a</sup> *Dipartimento di Chimica e Tecnologie Chimiche, Via P. Bucci, cubo 12C, Università della Calabria, 87036 Rende (CS), Italy*

<sup>b</sup> *Dipartimento di Chimica e Chimica Farmaceutica, via L. Borsari 46, Università degli Studi di Ferrara, 44121 Ferrara, Italy*

<sup>c</sup> *Dipartimento di Agraria, Università Telematica San Raffaele, Roma, Via di Val Cannuta, 247, 00166, Italy.*

<sup>d</sup> *Dipartimento di Farmacia e Scienze della Salute e della Nutrizione, Edificio Polifunzionale, Università della Calabria, 87036 Rende (CS), Italy.*

<sup>e</sup> *Dipartimento di Scienze Biomediche e Chirurgico Specialistiche, Via L. Borsari 46, Università di Ferrara, 44121 Ferrara, Italy*

*e-mail: [maiuolo@unical.it](mailto:maiuolo@unical.it); [denino@unical.it](mailto:denino@unical.it);*

|                                                     |     |
|-----------------------------------------------------|-----|
| <sup>1</sup> H and <sup>13</sup> C NMR spectra..... | S2  |
| NOESY.....                                          | S9  |
| ESI(+)- MS spectra.....                             | S12 |

**<sup>1</sup>H and <sup>13</sup>C NMR spectra of 4a-e and 5a-c**

***(E)-N-(5-nitro-2-oxindolin-3-ylidene)methanamine oxide 4a***

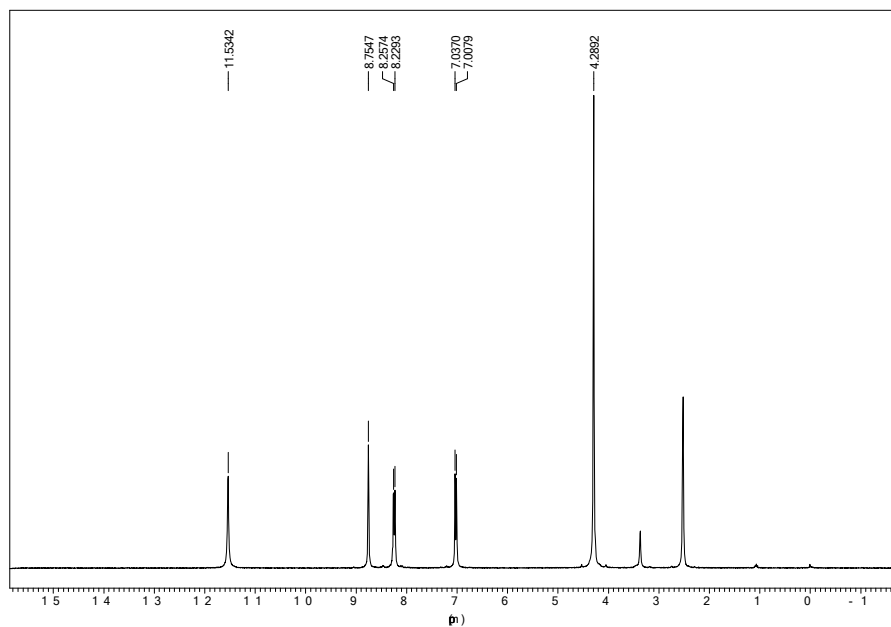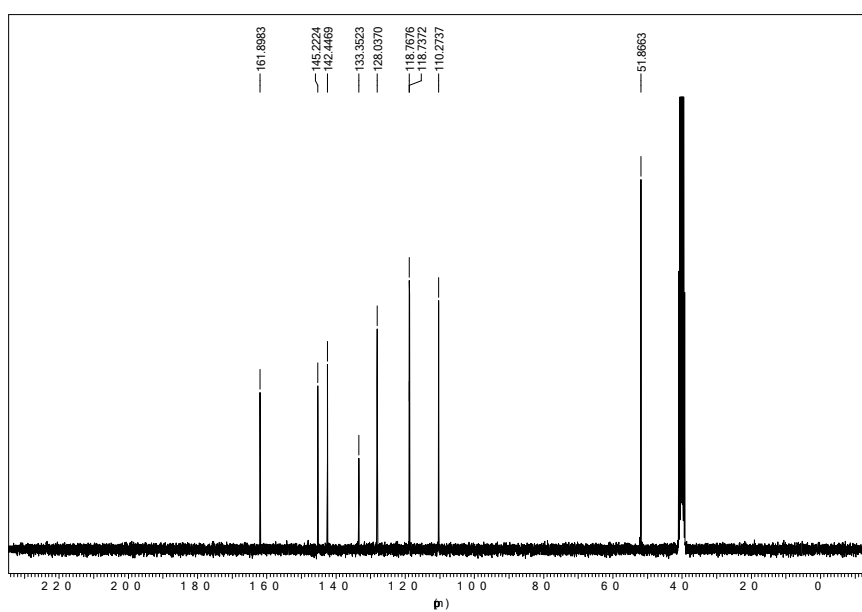

*(E)*-*N*-(2-oxoindolin-3-ylidene)aniline oxide **4b**

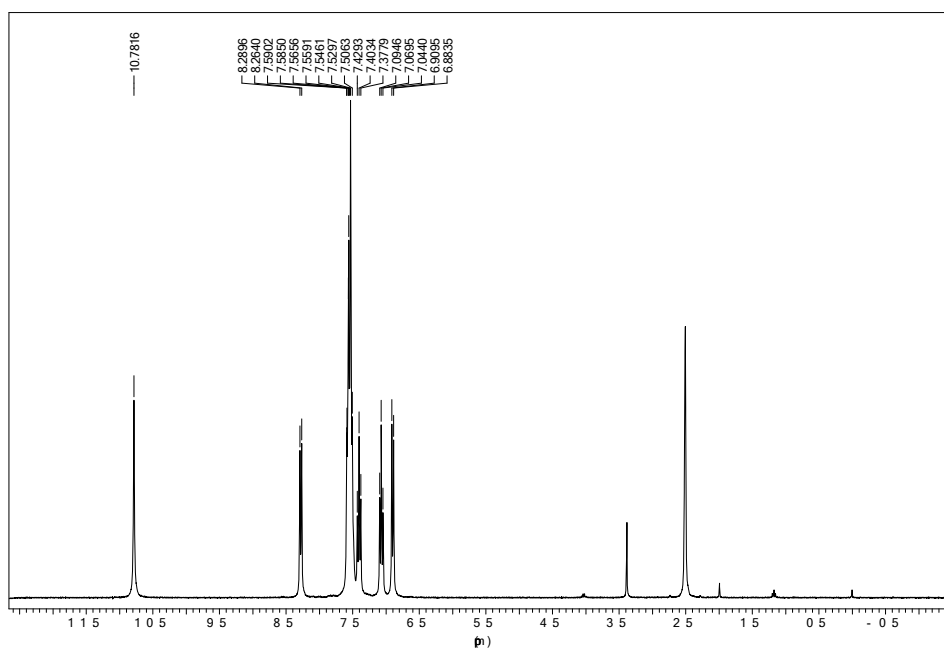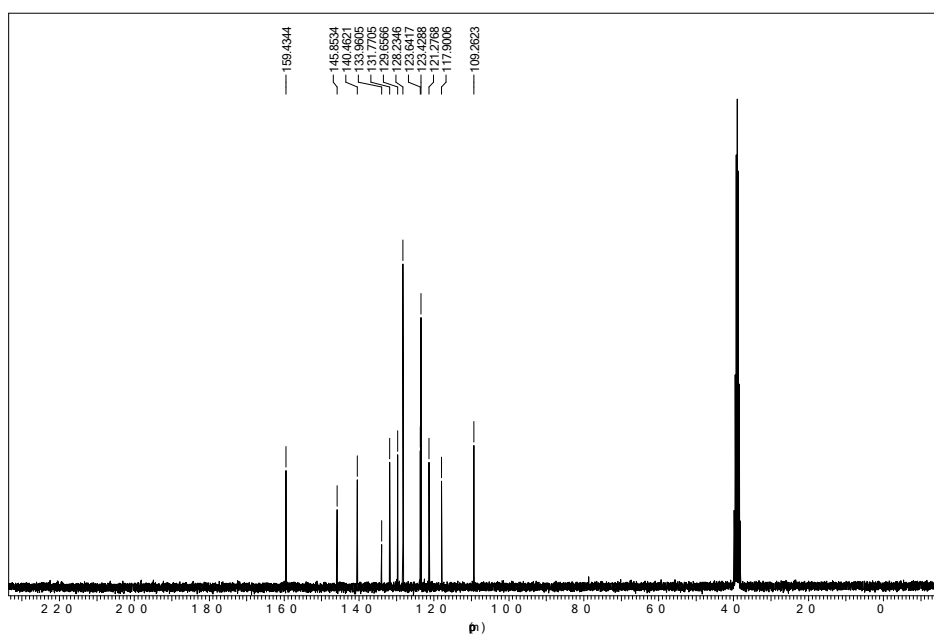

*(E)*-*N*-(5-nitro-2-oxindolin-3-ylidene)-1-phenylmethanamine oxide **4c**

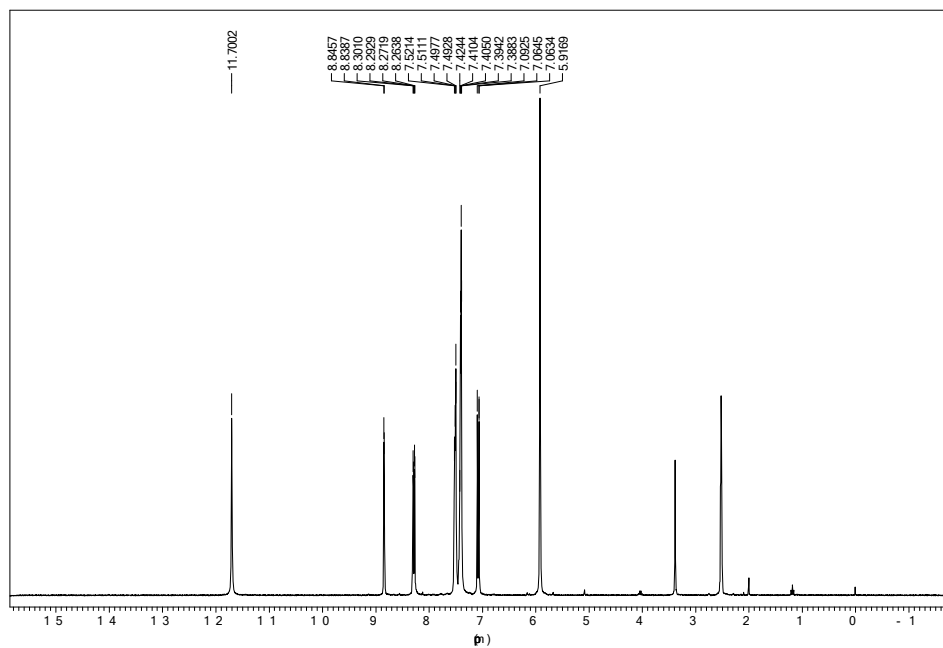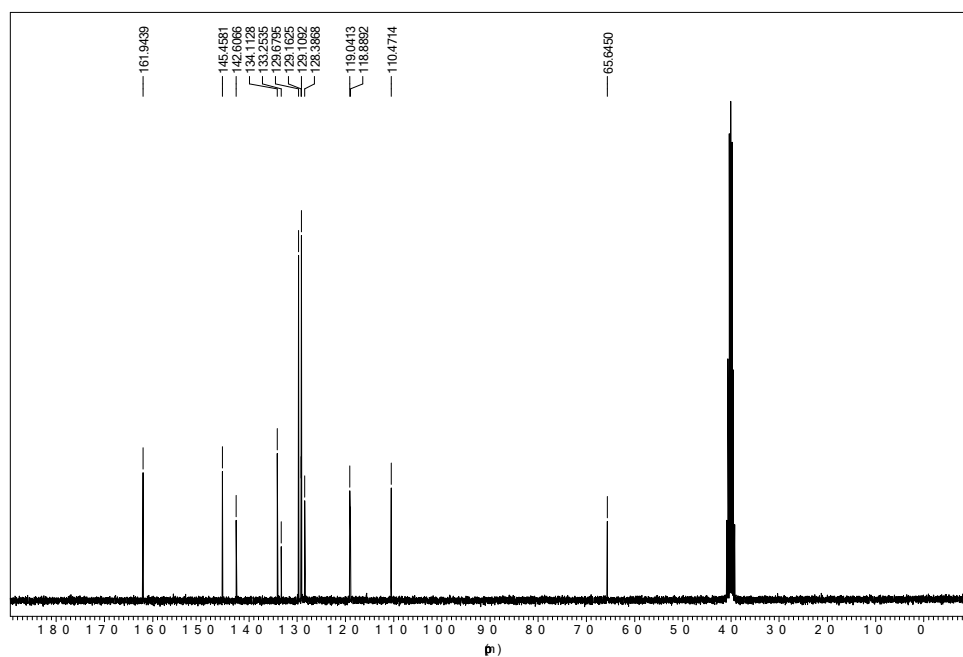

*(E)*-*N*-(2-oxoindolin-3-ylidene)-1-phenylmethanamine oxide **4d**

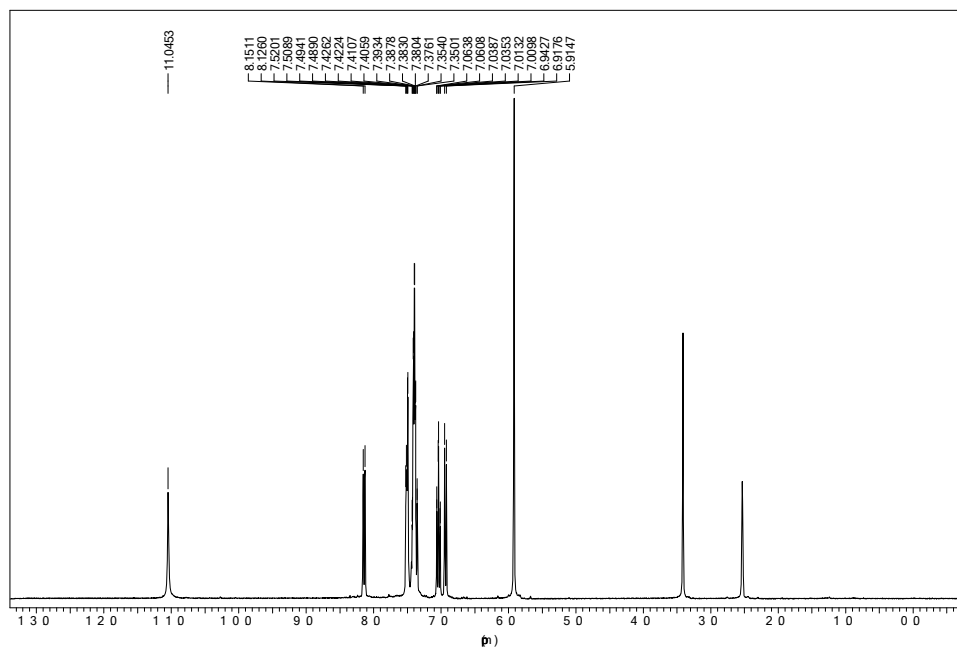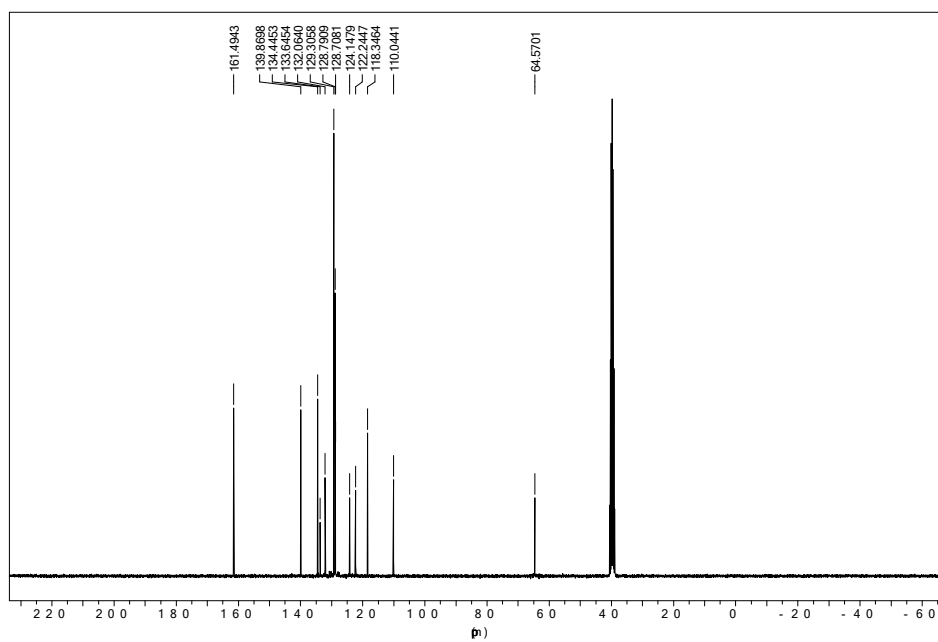

*(E)*-*N*-(1-methyl-2-oxoindolin-3-ylidene)-1-phenylmethanamine oxide **4e**

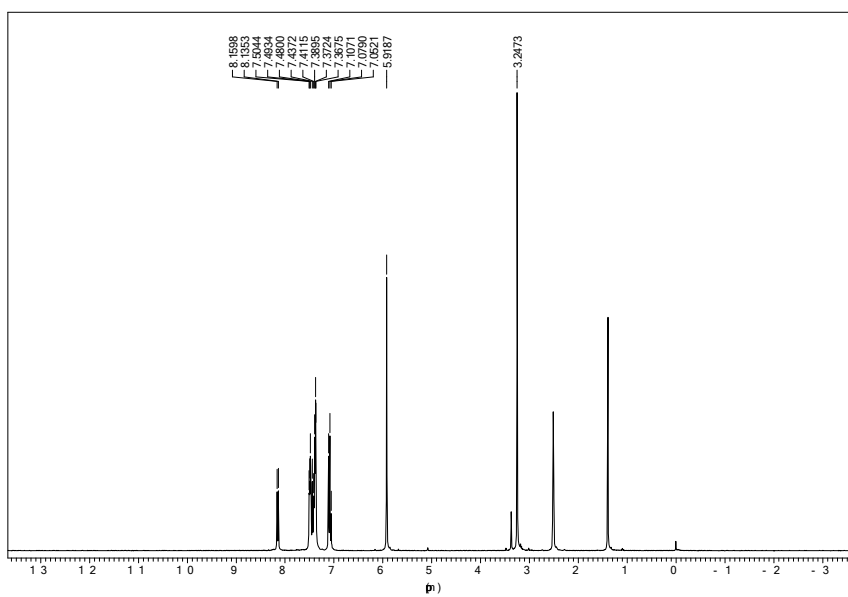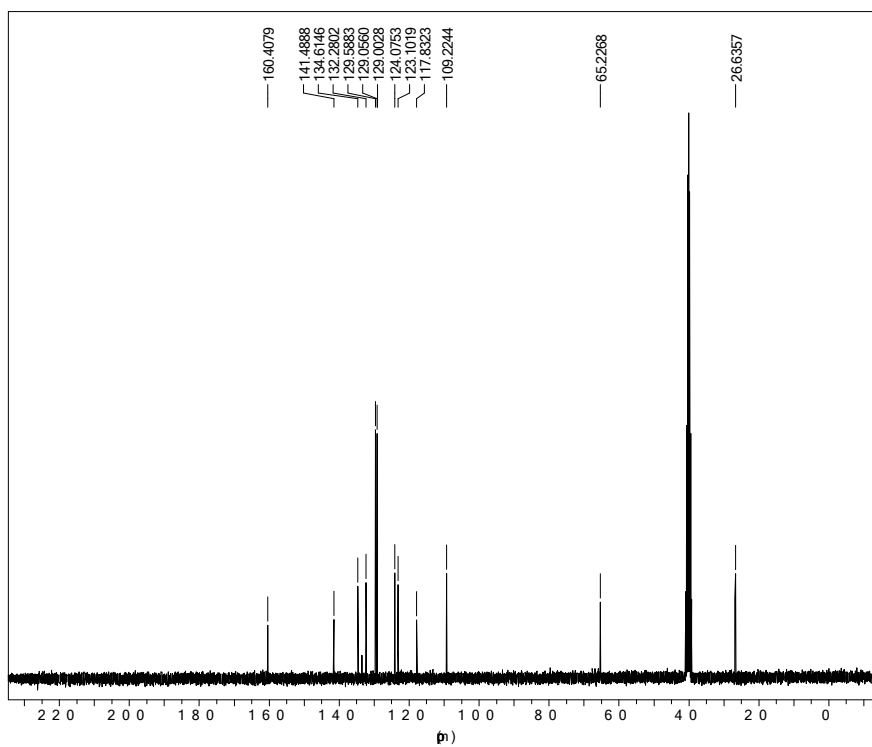

*(Z)*-*N*-(2,3-dihydro-1*H*-inden-1-ylidene)methanamine oxide **5a**

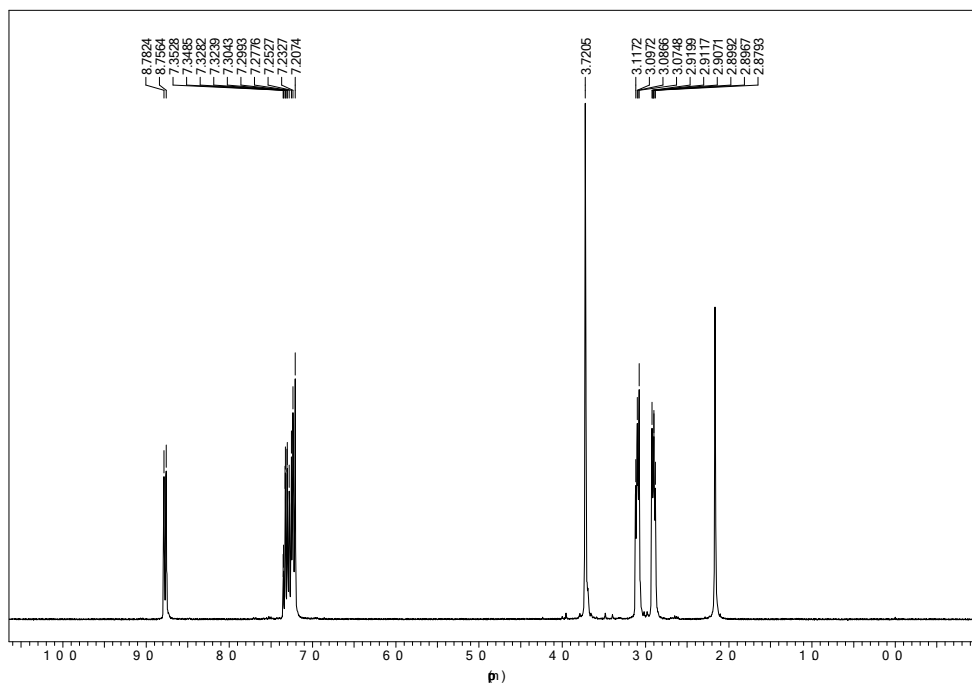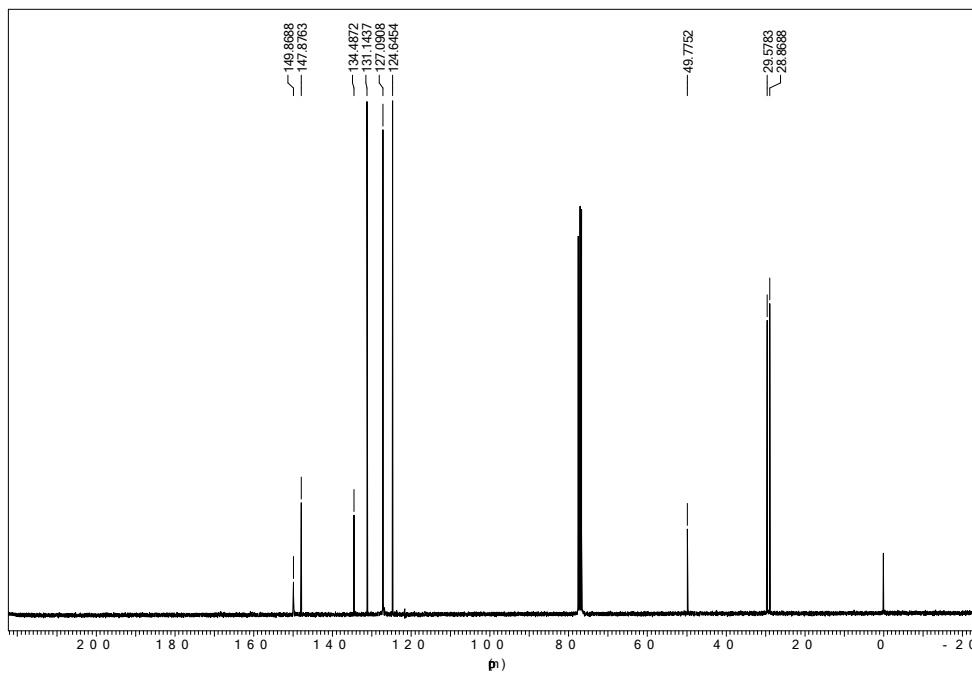

*(Z)-N-(5-fluoro-2,3-dihydro-1H-inden-1-ylidene)methanamine oxide*

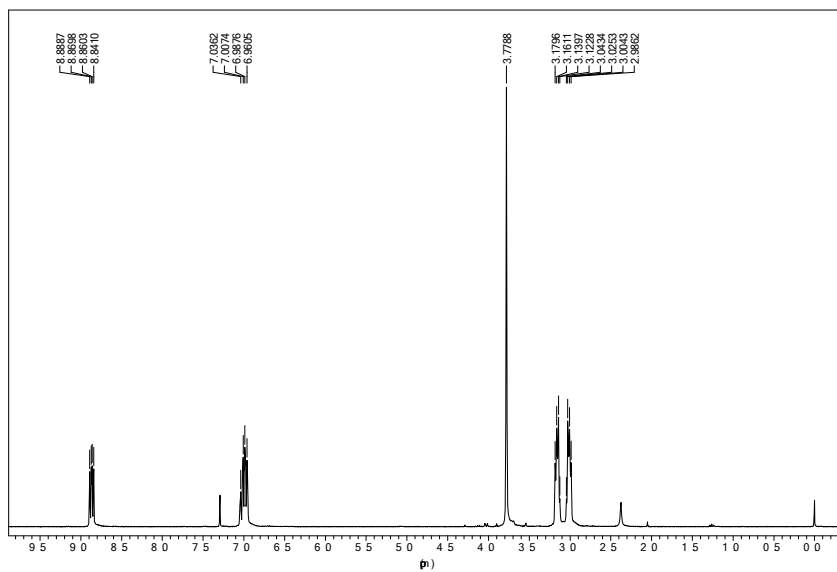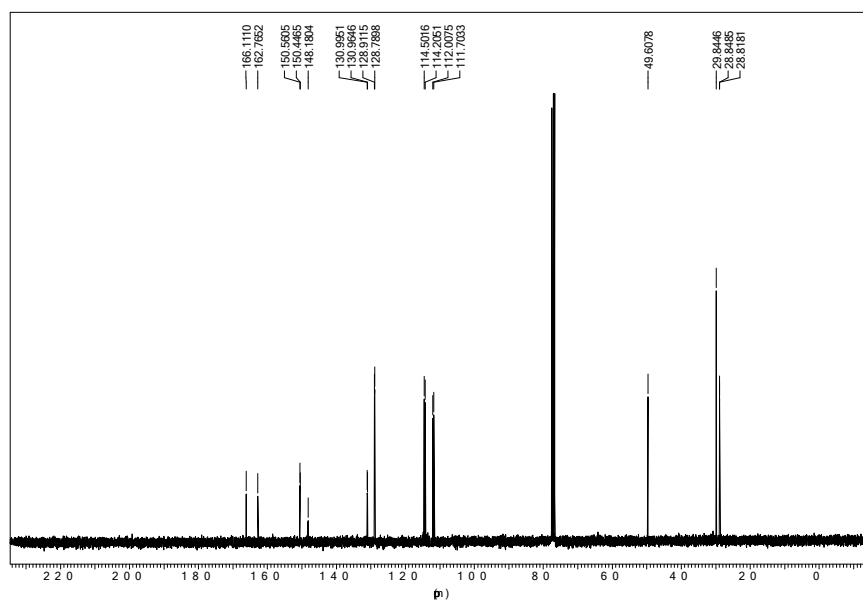



*(Z)*-*N*-(2,3-dihydro-1*H*-inden-1-ylidene)-1-phenylmethanamine oxide **5c**

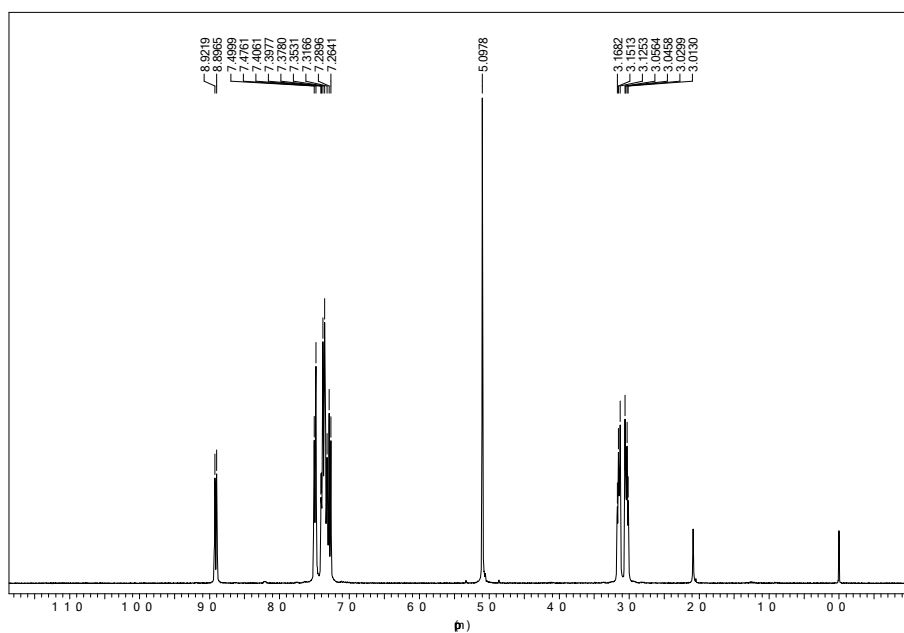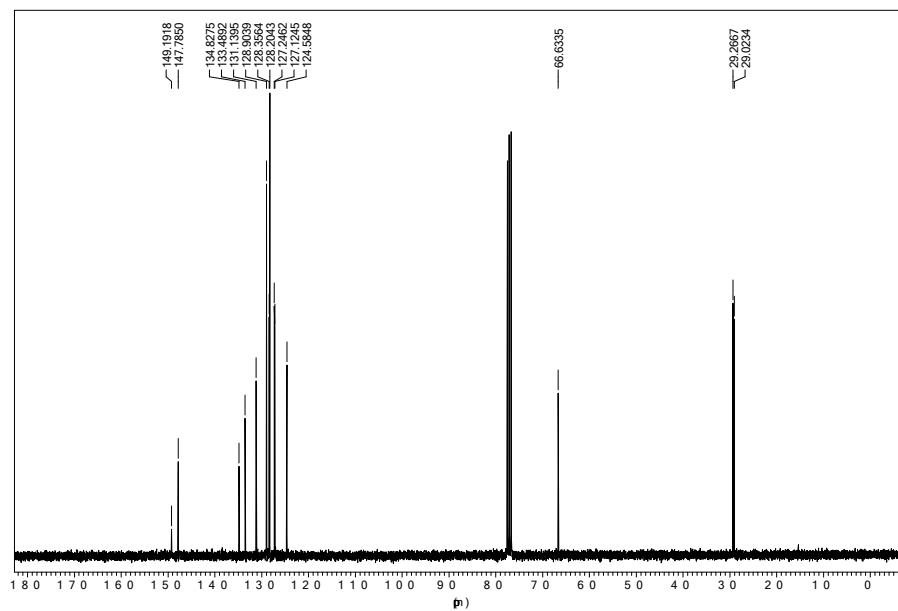

## NOESY of 4d and 5a

*(E)*-*N*-(2-oxoindolin-3-ylidene)-1-phenylmethanamine oxide 4d

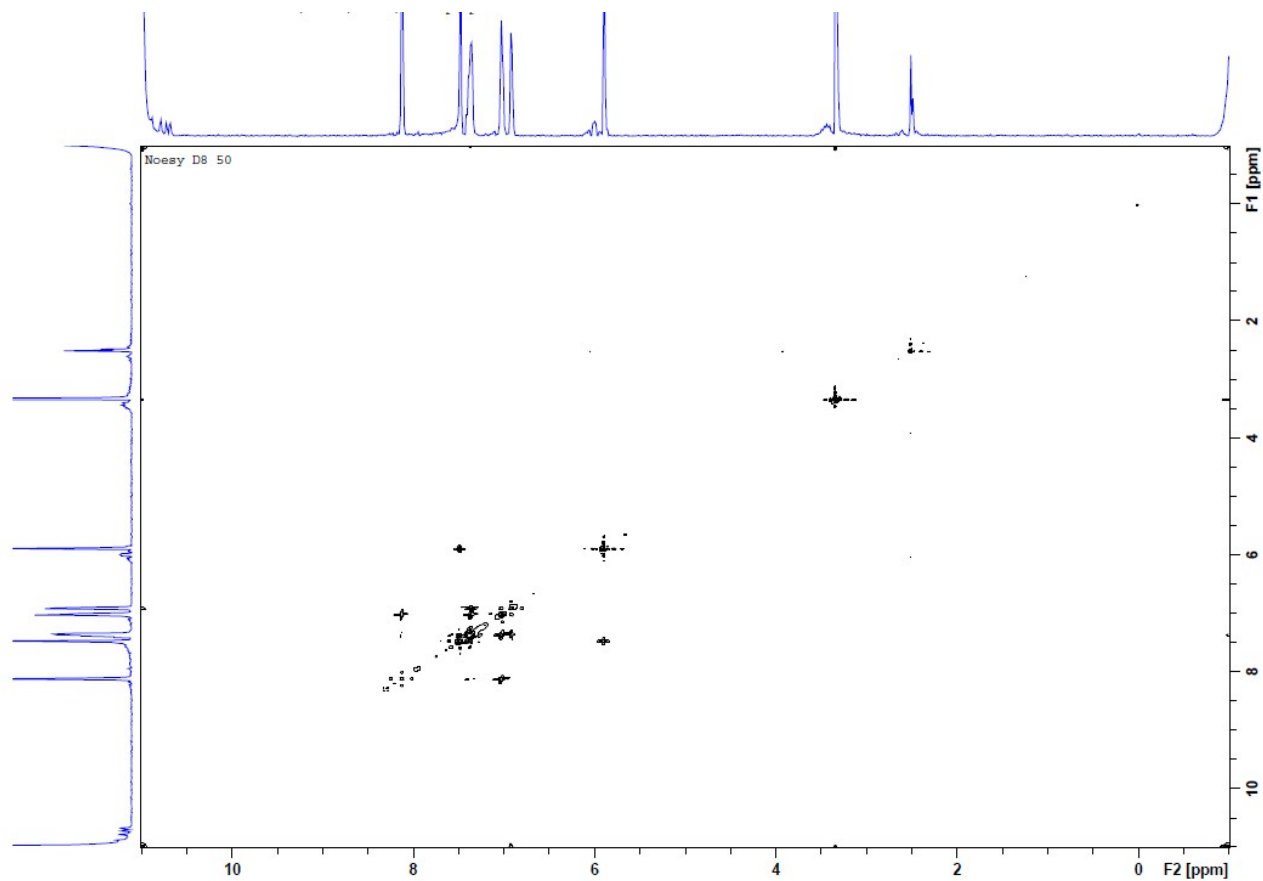

*(Z)*-N-(2,3-dihydro-1H-inden-1-ylidene)methanamine oxide **5a**

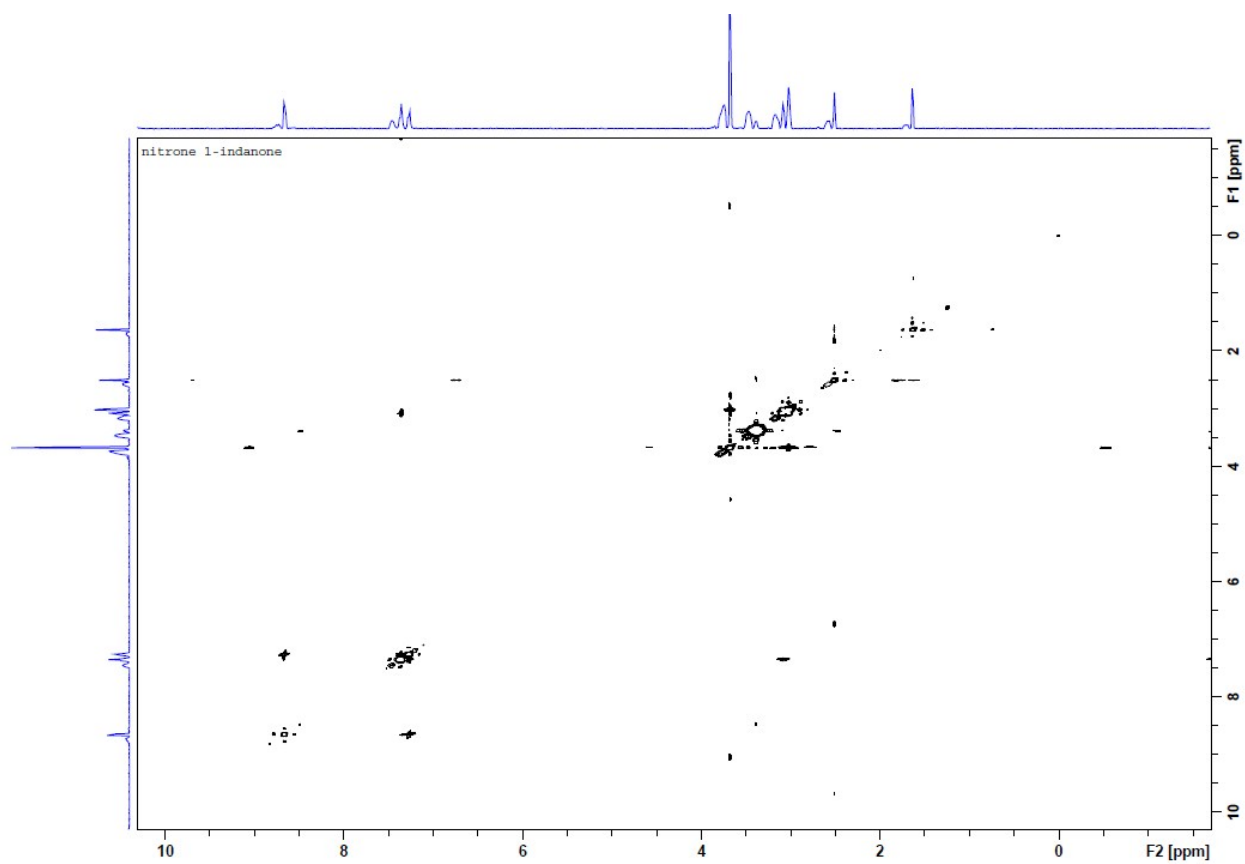

## ESI(+)-MS spectra of 4a-e and 5a-c

### *(E)-N-(5-nitro-2-oxoindolin-3-ylidene)methanamine oxide 4a*

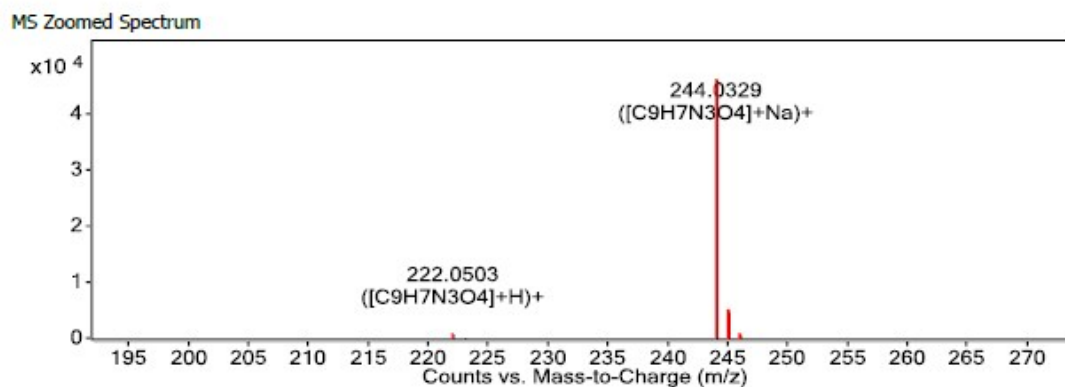

### *(E)-N-(2-oxoindolin-3-ylidene)aniline oxide 4b*

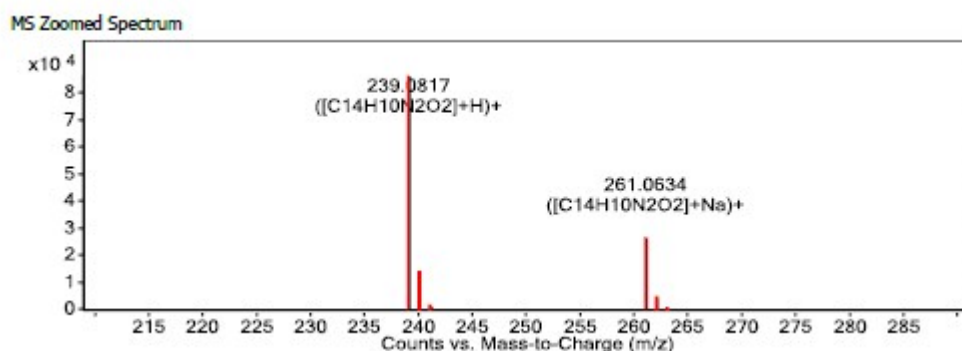

### *(E)-N-(5-nitro-2-oxoindolin-3-ylidene)-1-phenylmethanamine oxide 4c*

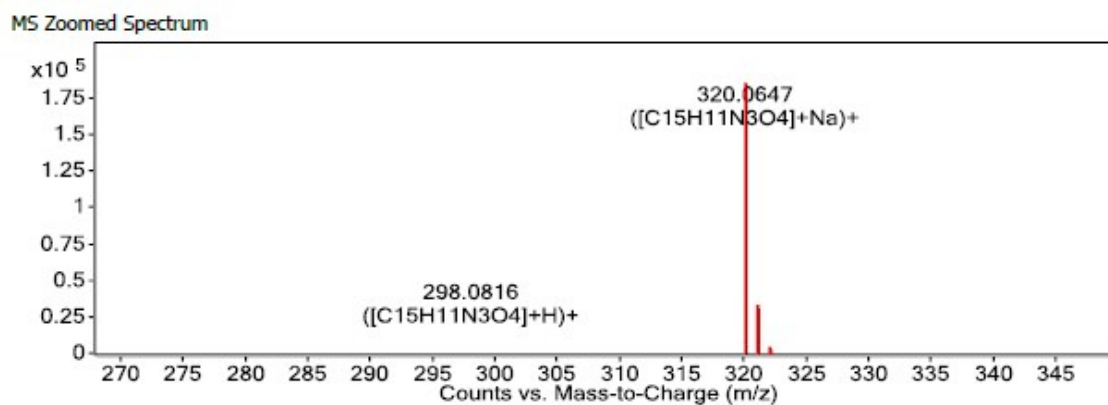

*(E)-N-(2-oxoindolin-3-ylidene)-1-phenylmethanamine oxide 4d*

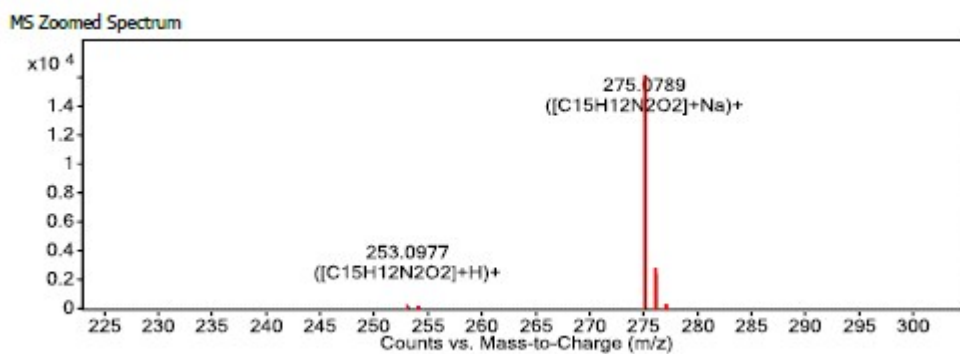

*(E)-N-(1-methyl-2-oxoindolin-3-ylidene)-1-phenylmethanamine oxide 4e*

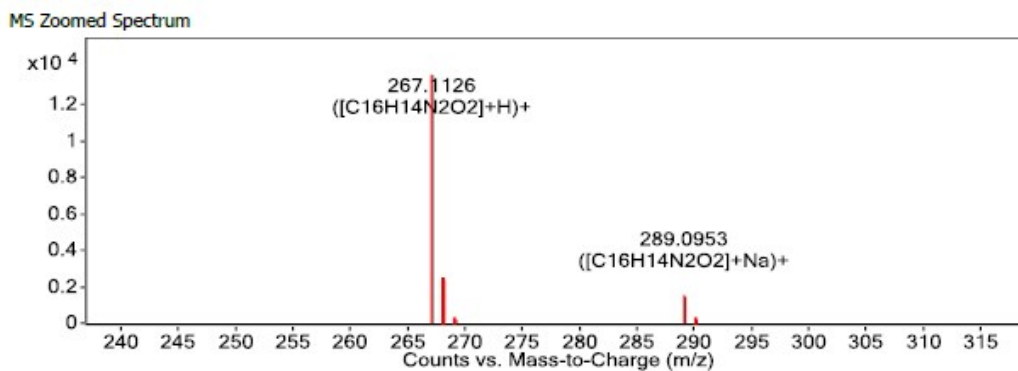

*(Z)-N-(2,3-dihydro-1H-inden-1-ylidene)methanamine oxide 5a*

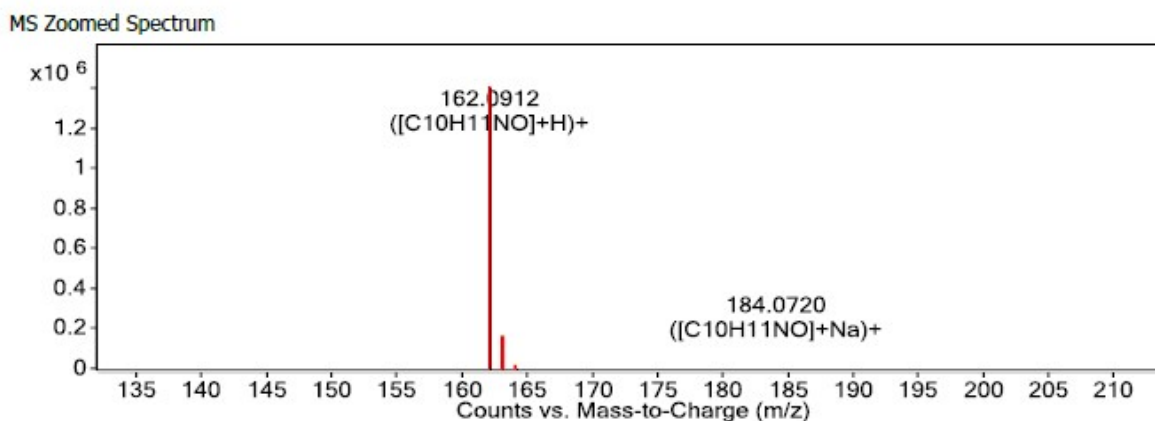

*(Z)*-N-(5-fluoro-2,3-dihydro-1H-inden-1-ylidene)methanamine oxide 5b

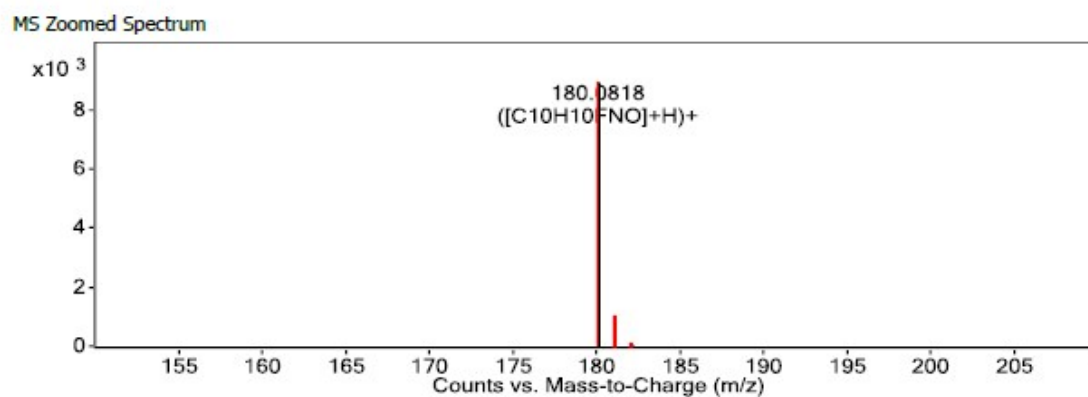

*(Z)*-N-(2,3-dihydro-1H-inden-1-ylidene)-1-phenylmethanamine oxide 5c

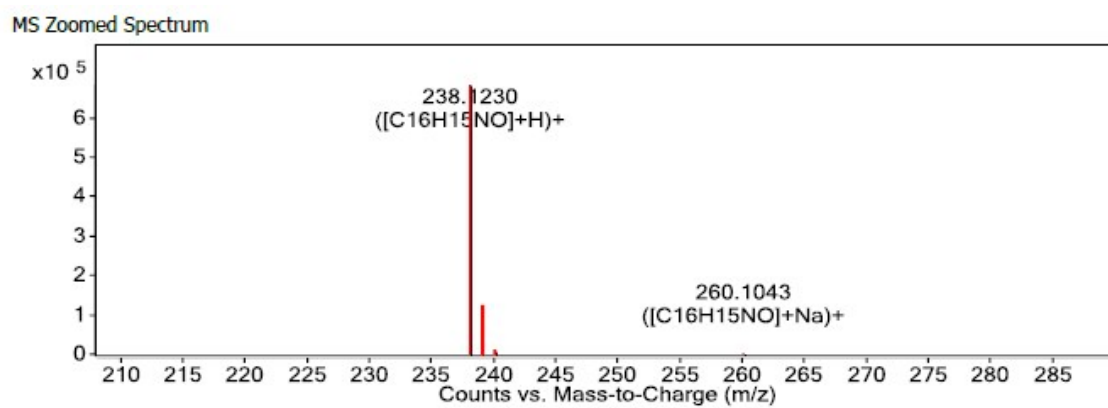

Supplement: c7md00537g1.pdf [file c7md00537g1.pdf]
